# Supplementary material for: Linear and Branched PEIs (Polyethylenimines) and Their Property Space
Source: PubMed Central journal article supplement (PMC4849011; doi:10.3390/ijms17040555), 2016-04-13

# Supplementary Material: Linear and Branched PEIs (Polyethylenimines) and Their Properties Space

Claudiu N. Lungu, Mircea V. Diudea, Mihai V. Putz and Ireneusz P. Grudziński

## (I) LPEI and BPEI Structures Used in Bought Groups (C14N8-C18N10)

C14N8  
01

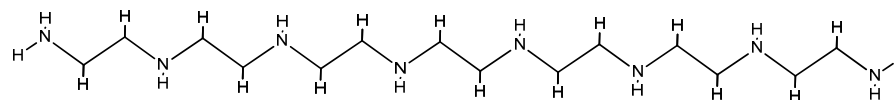

C14N8  
02

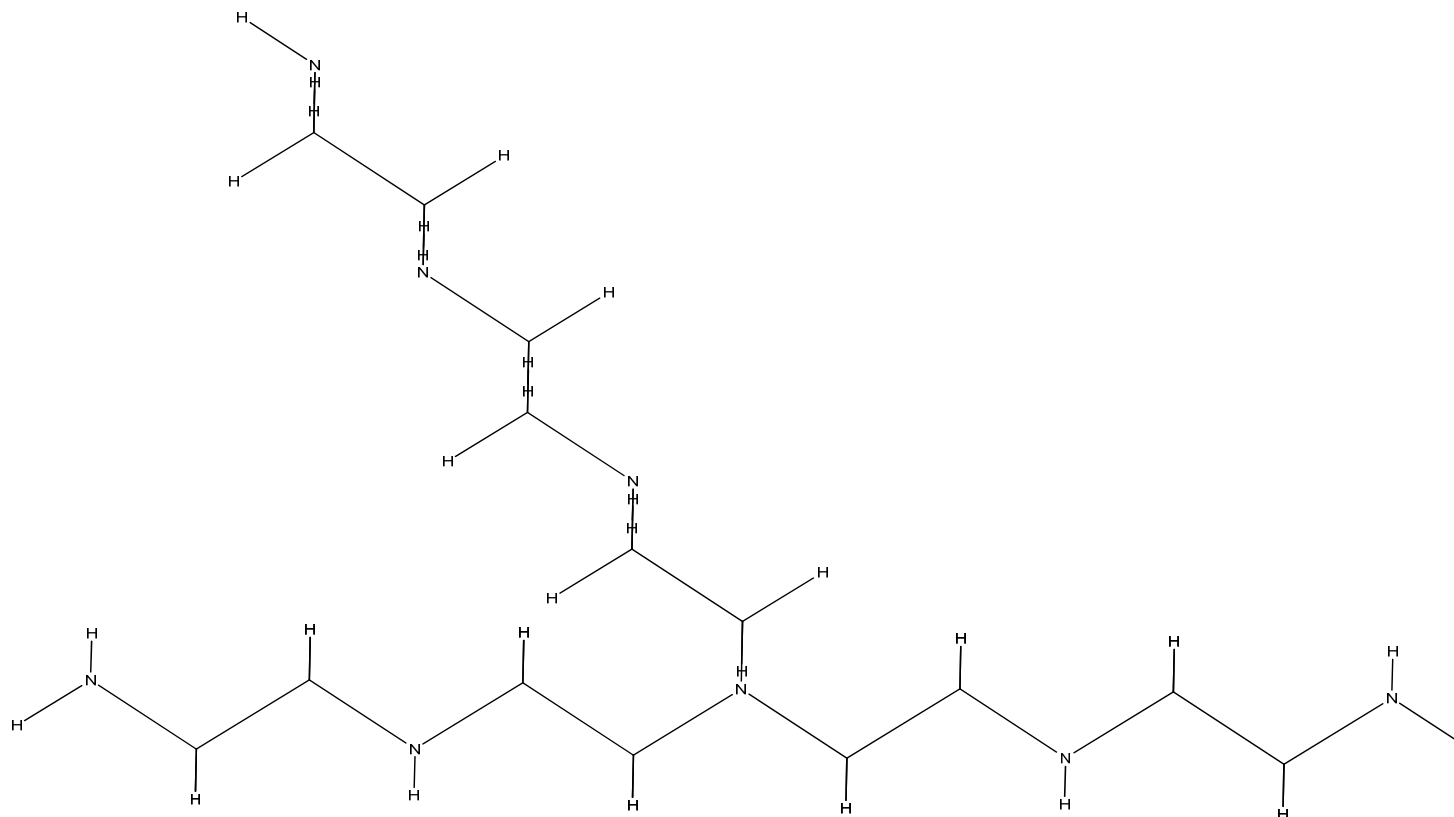

C14N8  
03

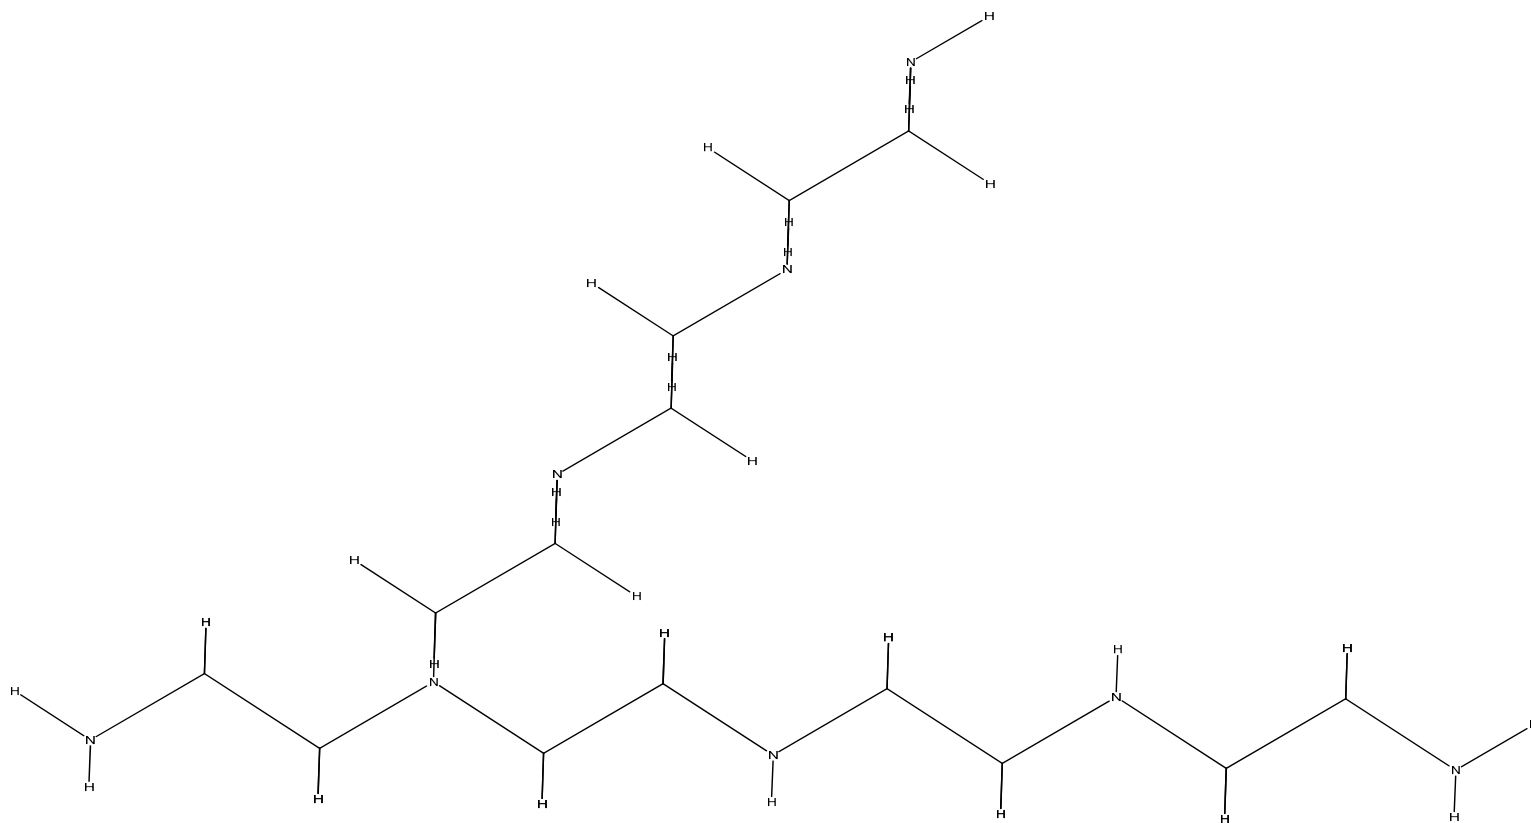

C14N8  
04

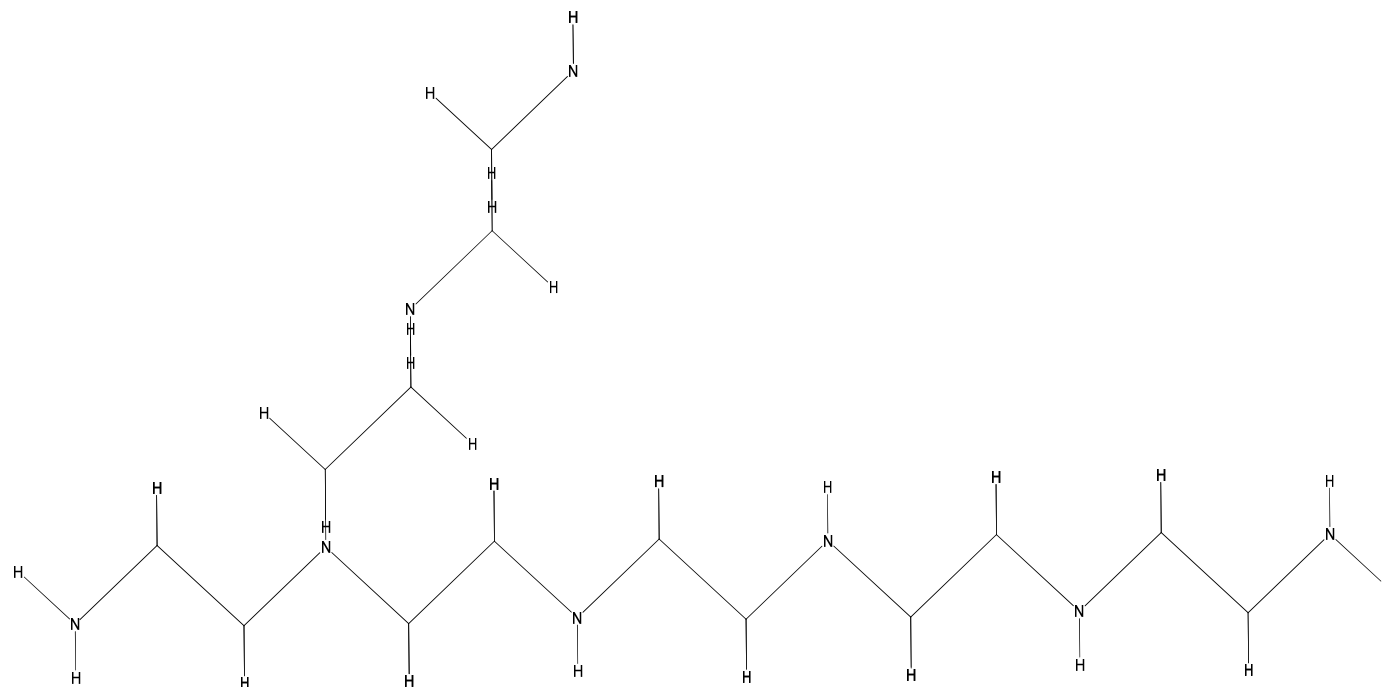

C18N10  
01

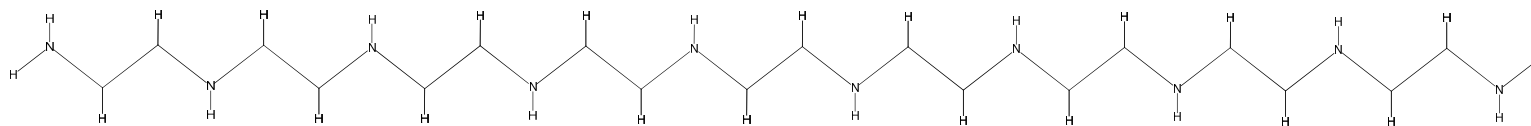

C18N10  
02

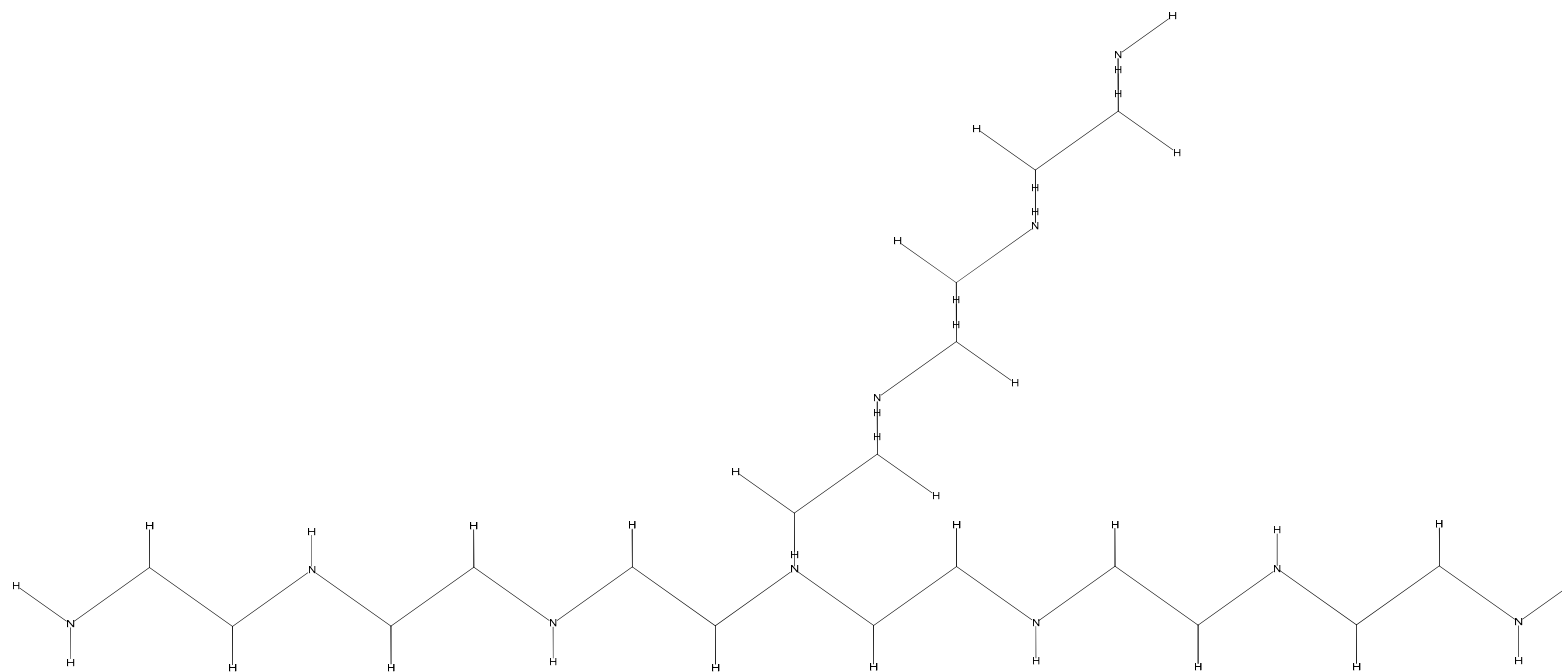

C18N10  
03

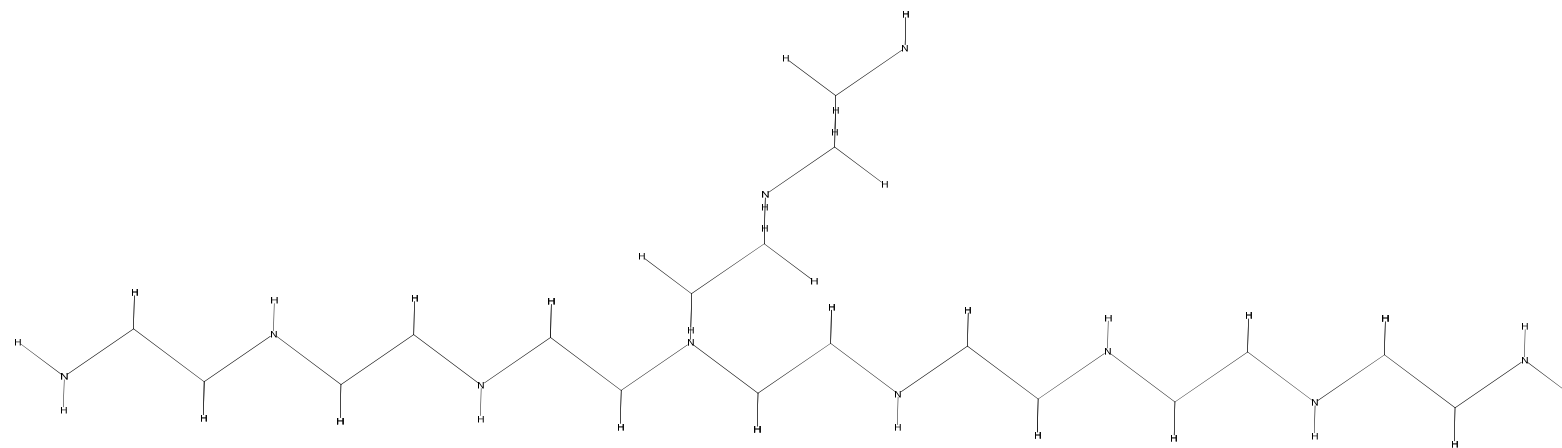

C18N10  
04

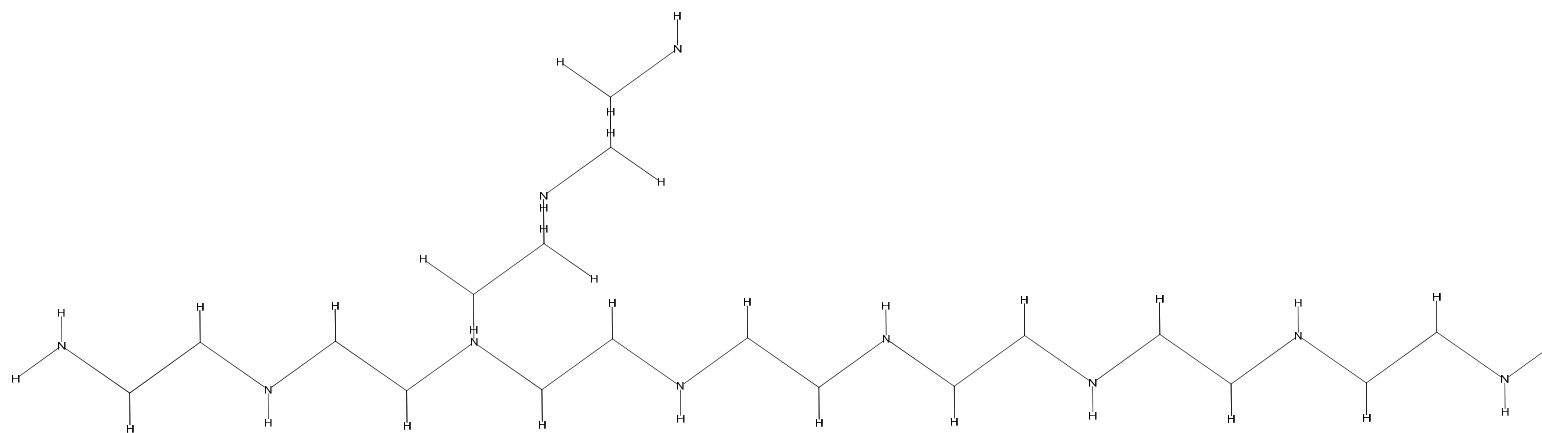

**(II) Polynomial Trend Line Cluster Equations**

**C14N8**

$$y = -0.000x^4 - 1(E - 05)x^3 + 4.278x^2 + 0.675x - 13,858 \quad (1)$$

$$y = -0.000x^4 - 2(E - 05)x^3 - 31.72x^2 + 0.555x + 10,279 \quad (2)$$

$$y = 0.000x^4 - 2(E - 05)x^3 - 30.06x^2 + 0.661x + 97,401 \quad (3)$$

$$y = +4.278x^2 + 0.675x - 13,858 \quad (1)$$

$$y = -31.72x^2 + 0.555x + 10,279 \quad (2)$$

$$y = -30.06x^2 + 0.661x + 97,401 \quad (3)$$

**C18N10**

$$y = 0.000x^4 - 1(E - 05)x^3 - 10.91x^2 + 0.628x + 35,368 \quad (1)$$

$$y = 0.000x^4 - 1(E - 05)x^3 - 21.96x^2 + 0.524x + 71,194 \quad (2)$$

$$y = 0.000x^4 - 1(E - 05)x^3 - 14.96x^2 + 0.622x + 48,499 \quad (3)$$

$$y = -10.91x^2 + 0.628x + 35,368 \quad (1)$$

$$y = -21.96x^2 + 0.524x + 71,194 \quad (2)$$

$$y = -14.96x^2 + 0.622x + 48,499 \quad (3)$$

**C14N8 & C18N10**

$$y = 0.001x^4 - 2(E - 05)x^3 - 36.53x^2 + 0.605x + 11,837 \quad (7)$$

$$y = 0.000x^4 - 2(E - 05)x^3 - 30.07x^2 + 0.661x + 97,426 \quad (3)$$

$$y = 0.000x^4 - 7(E - 06)x^3 - 14.54x^2 + 0.276x + 47,143 \quad (6)$$

$$y = 0.000x^4 - 2(E - 05)x^3 - 31.73x^2 + 0.555x + 10,282 \quad (2)$$

$$y = 0.001x^4 - 3(E - 05)x^3 - 36.09x^2 + 0.637x + 11,694 \quad (5)$$

$$y = 0.000x^4 - 2(E - 05)x^3 - 30.16x^2 + 1.061x + 97,735 \quad (4)$$

$$y = -36.53x^2 + 0.605x + 11,837 \quad (7)$$

$$y = -30.07x^2 + 0.661x + 97,426 \quad (3)$$

$$y = -14.54x^2 + 0.276x + 47,143 \quad (6)$$

$$y = -31.73x^2 + 0.555x + 10,282 \quad (2)$$

$$y = -36.09x^2 + 0.637x + 11,694 \quad (5)$$

$$y = -30.16x^2 + 1.061x + 97,735 \quad (4)$$

**(III) Second Degree Equations Square Roots**

**C14N8**

| Equation                                    | Square Root 1 | Square Root 2 |
|---------------------------------------------|---------------|---------------|
| $y = +4.278x^2 + 0.675x - 13,858 \quad (1)$ | -56.9944      | 56.8366       |
| $y = -31.72x^2 + 0.555x + 10,279 \quad (2)$ | -17.9928      | 18.0103       |
| $y = -30.06x^2 + 0.661x + 97,401 \quad (3)$ | -56.9119      | 56.9339       |

**C18N10**

| Equation                                    | Square Root 1 | Square Root 2 |
|---------------------------------------------|---------------|---------------|
| $y = -10.91x^2 + 0.628x + 35,368 \quad (1)$ | -56.908       | 56.9656       |
| $y = -21.96x^2 + 0.524x + 71,194 \quad (2)$ | -56.9265      | 56.9504       |
| $y = -14.96x^2 + 0.622x + 48,499 \quad (3)$ | -56.917       | 56.9586       |

**C14N8 & C18N10**

| Equation                              | Square Root 1 | Square Root 2 |
|---------------------------------------|---------------|---------------|
| $y = -30.07x^2 + 0.661x + 97,426$ (3) | -56.9098      | 56.9318       |
| $y = -14.54x^2 + 0.276x + 47,143$ (6) | -56.9317      | 56.9507       |
| $y = -31.73x^2 + 0.555x + 10,282$ (2) | -17.9926      | 18.01         |
| $y = -36.09x^2 + 0.637x + 11,694$ (5) | -17.9918      | 18.0095       |
| $y = -30.16x^2 + 1.061x + 97,735$ (4) | -56.9082      | 56.9434       |

**(IV) Charts for Equations**

**C14N8**

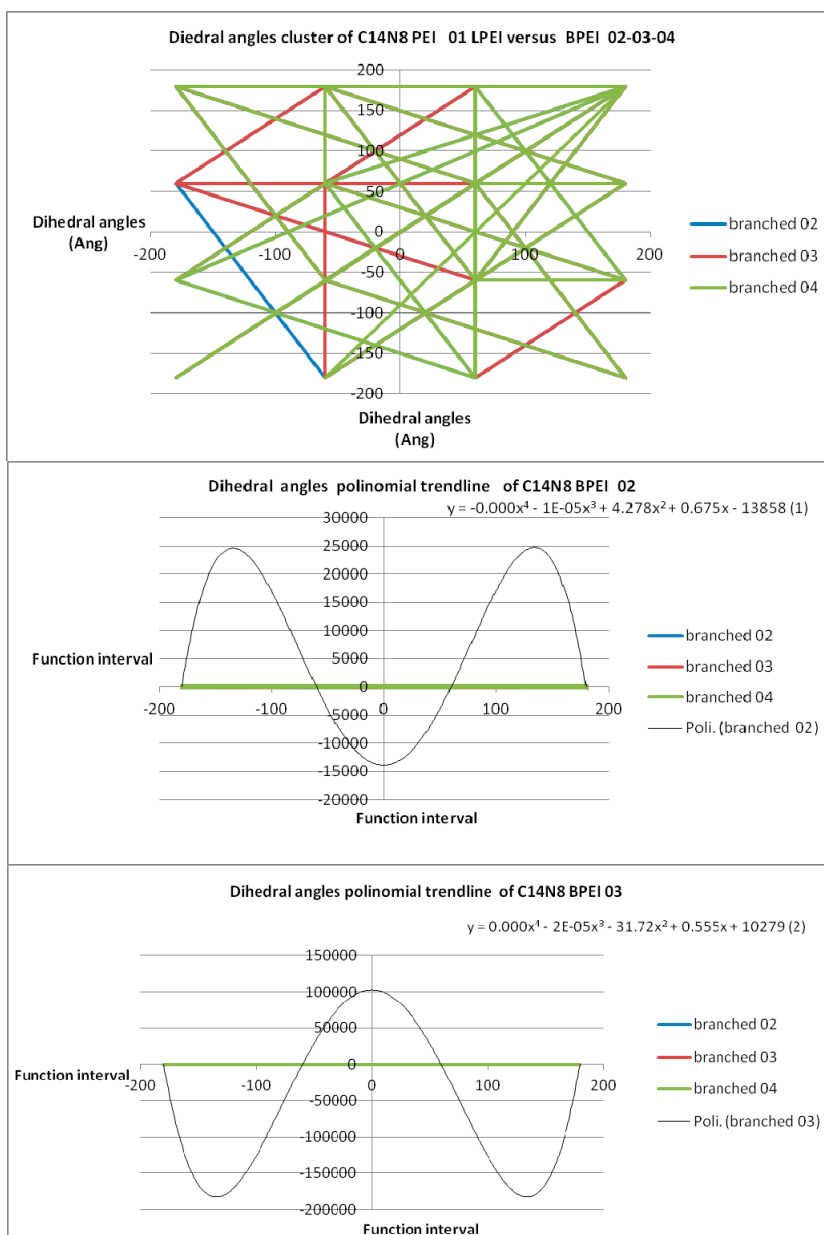

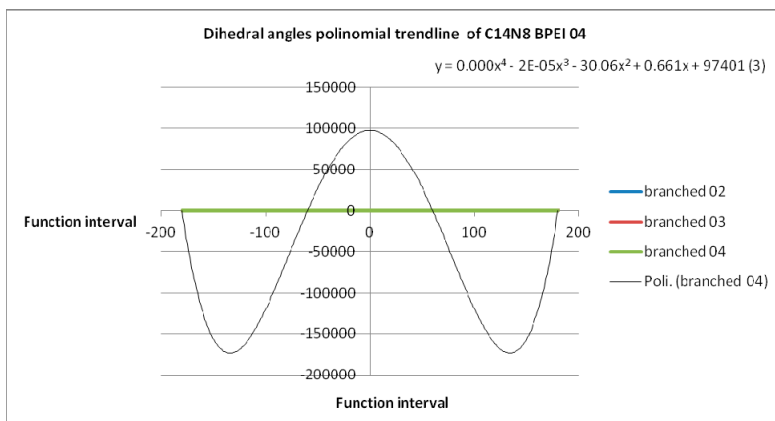

**C18N10**

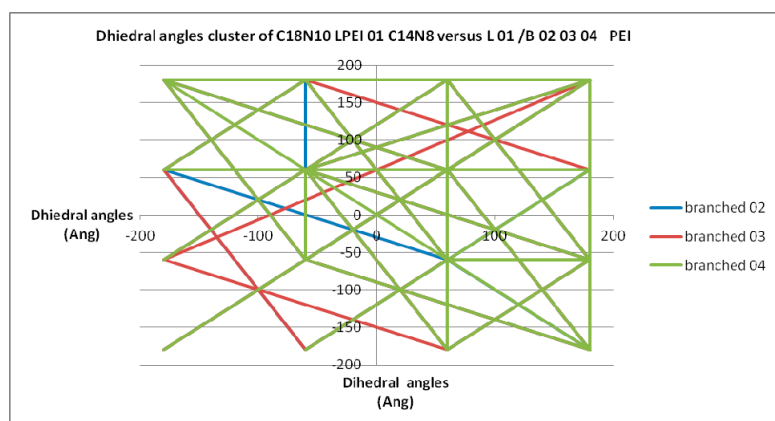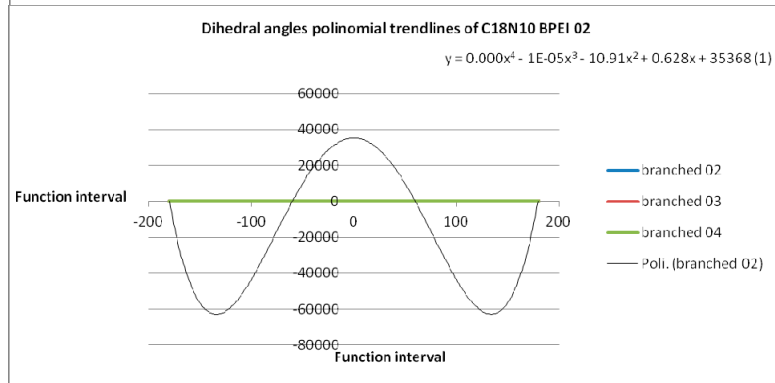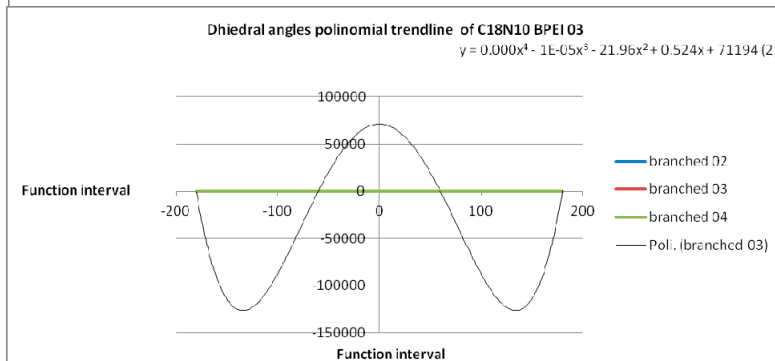



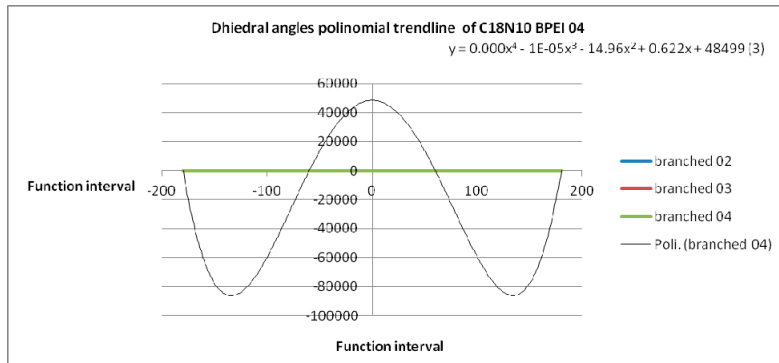

**C14N10 & C18N10**

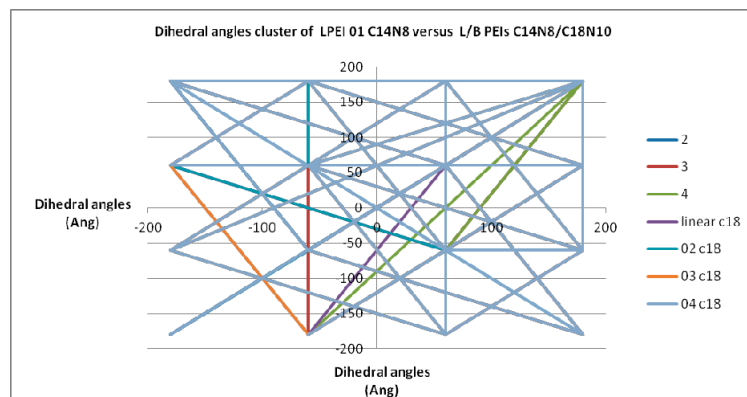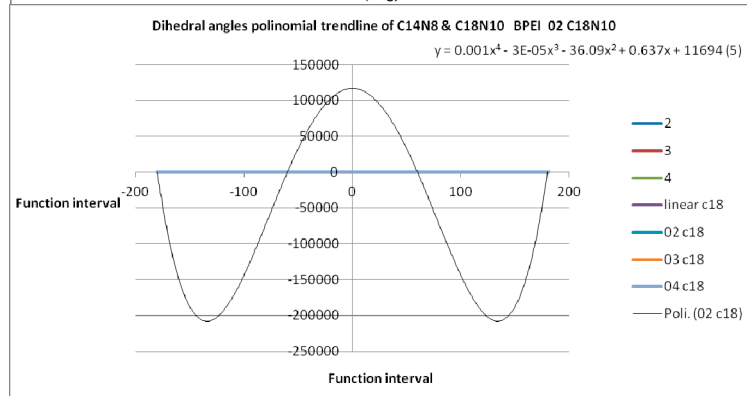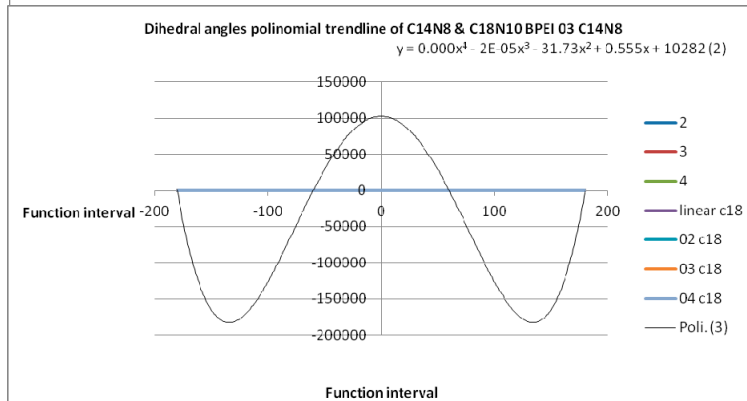

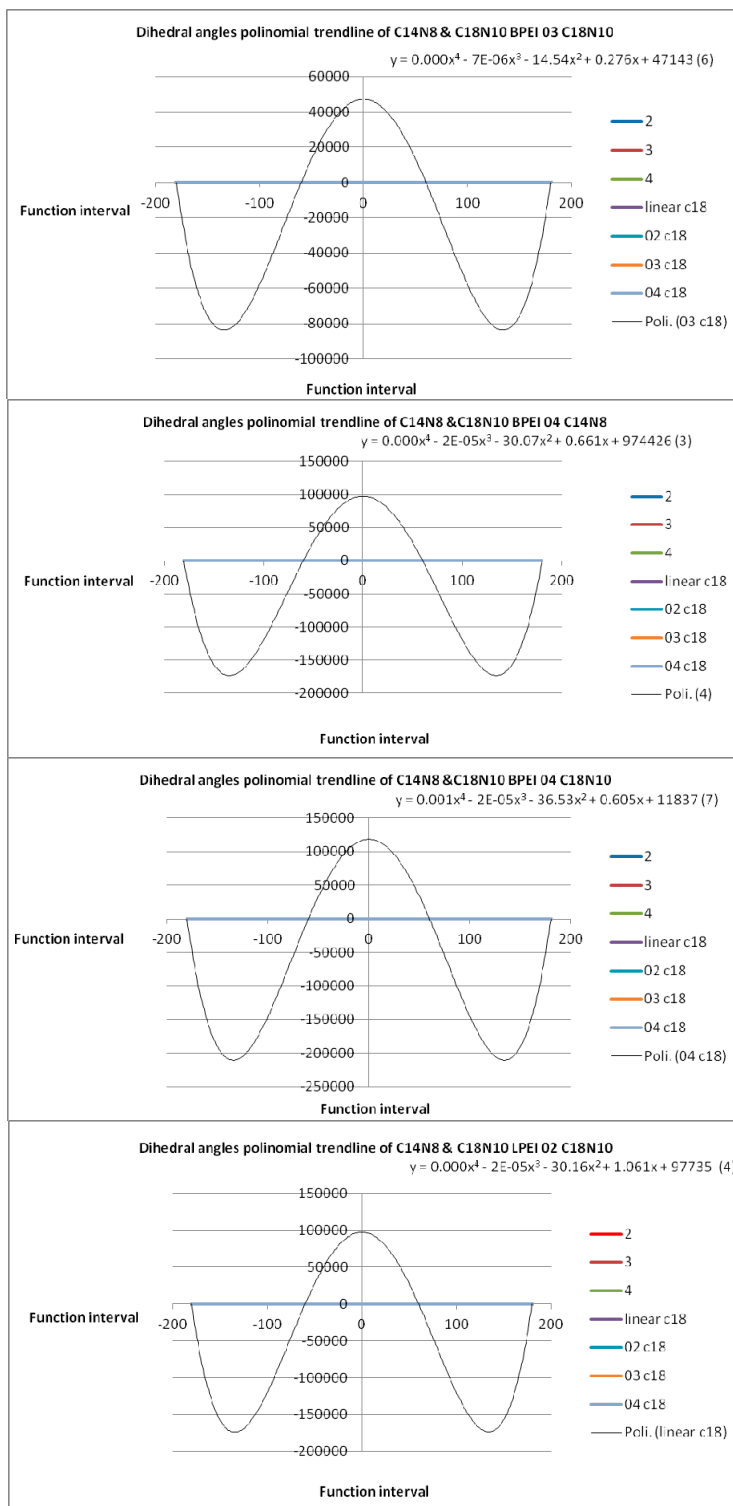

Supplement: ijms-17-00555-s001.pdf [file ijms-17-00555-s001.pdf]
